# Supplementary material for: Plasmodium falciparum variant erythrocyte surface antigens: a pilot study of antibody acquisition in recurrent natural infections
Source: Springer Nature journal article supplement (doi:10.1186/s12936-017-2097-0), 2017-11-07
Supplement: MOESM2 [file 15205330]

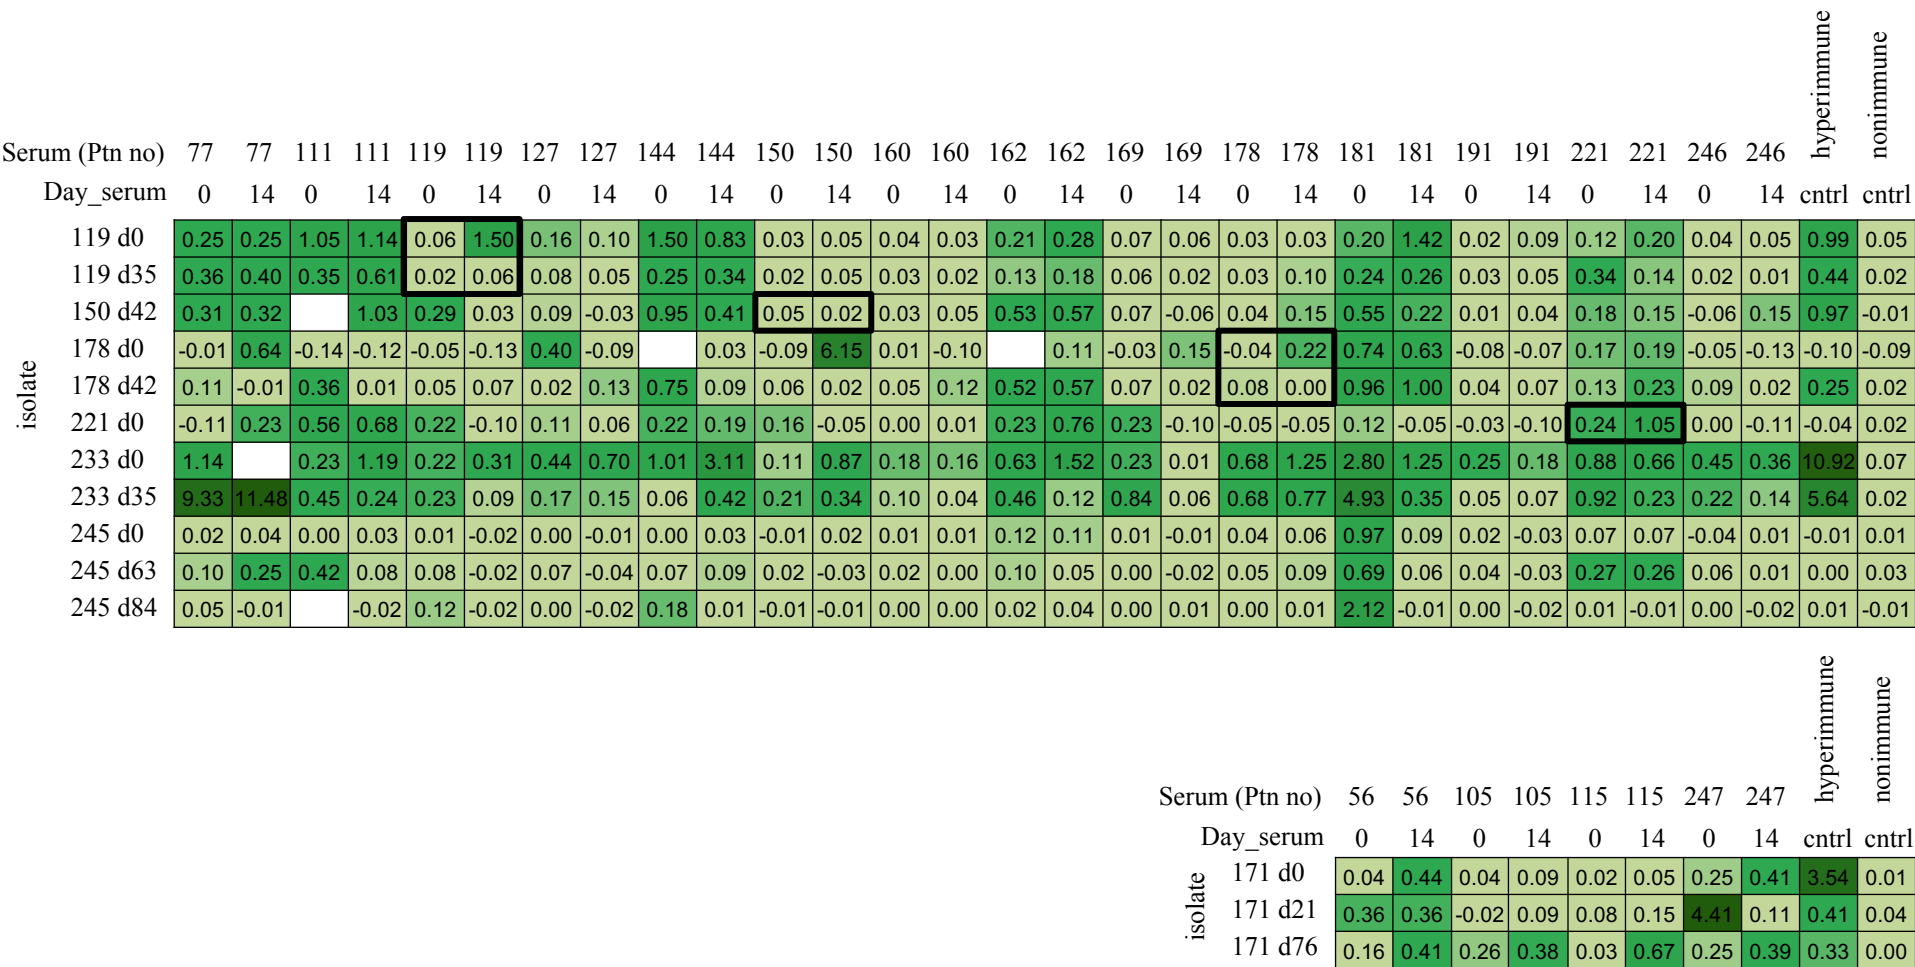

Figure S1. Heat map showing heterologous recognition of each individual isolate-serum pair (with homologous recognition in bold boxes). Mean Fluorescence Intensity is shown for each isolate-serum pair, and is colour graded in a scale from light green (lowest values), to dark green (highest values).
